# Supplementary material
Source: publisher figshare collection journal article supplement (https://karger.figshare.com/ndownloader/files/28689096)
Supplement: Supplementary file 1 [file 28689096]

## Sheet: Data_S1_16S_long_reads
Data_S1_Culture BP: Long-read 16S rRNA gene sequences, relative abundance, taxonomy and top 5 hits from BLAST NCBI
Sequence	Count	Relative abundance	Taxonomy						Top 5 hits from BLAST results against NCBI 16S rRNA database to isolated bacteria
									1st			2nd			3rd			4th			5th
			Kingdom	Phylum	Class	Order	Family	Genus	Type	Cover %	Identity %	Type	Cover %	Identity %	Type	Cover %	Identity %	Type	Cover %	Identity %	Type	Cover %	Identity %
ATTGAACGCTGGCGGCATGCCTTACACATGCAAGTCGAACGGCAGCGCGGGAGCAATCCTGGCGGCGAGTGGCGAACGGGTGAGTAATATATCGGAACGTGCCTTAGAGTGGGGGATAACTAGTCGAAAGACTAGCTAATACCGCATACGACCTACGGGTGAAAGTGGGGGATCGCAAGACCTCATGCTCTTAGAGCGGCCGATATCTGATTAGCTAGTTGGTGGGGTAAAAGCCTACCAAGGCGACGATCAGTAGCTGGTCTGAGAGGACGACCAGCCACACTGGGACTGAGACACGGCCCAGACTCCTACGGGAGGCAGCAGTGGGGAATTTTGGACAATGGGGGCAACCCTGATCCAGCAATGCCGCGTGTGTGAAGAAGGCCTTCGGGTTGTAAA…	2458	0.313881	Bacteria	Proteobacteria	Gammaproteobacteria	Betaproteobacteriales	Burkholderiaceae	Noviherbaspirillum	Noviherbaspirillum autotrophicum strain TSA66	100	98.97	Noviherbaspirillum agri strain K-1-15	100	98.76	Noviherbaspirillum denitrificans strain TSA40	100	97.94	Noviherbaspirillum soli strain SUEMI10	100	97.18	Noviherbaspirillum aurantiacum strain SUEMI08	100	97.12
ATTGAACGCTGGCGGCATGCTTTACACATGCAAGTCGAACGGCAGCACGGGGGCAACCCTGGTGGCGAGTGGCGAACGGGTGAGTAATATATCGGAACATATCCGGAAGTGGGGGATAACGTAGCGAAAGTTACGCTAATACCGCATATGCCCTGAGGGGGAAAGGGGGGGATCGCAAGACCTCTCGCTTTCGGAGTGGCCGATATCGGATTAGCTAGTTGGTGAGGTAAAGGCTCACCAAGGCGACGATCCGTAGCTGGTCTGAGAGGACGACCAGCCACACTGGGACTGAGACACGGCCCAGACTCCTACGGGAGGCAGCAGTGGGGAATTTTGGACAATGGGCGCAAGCCTGATCCAGCCATGCCGCGTGAGTGAAGAAGGCCTTCGGGTTGTAAA…	2140	0.273273	Bacteria	Proteobacteria	Gammaproteobacteria	Betaproteobacteriales	Gallionellaceae	NA	Sideroxydans lithotrophicus ES-1	100	95.3	Gallionella capsiferriformans ES-2	100	94.26	Ferriphaselus amnicola strain OYT1	93	94.17	Azospira oryzae strain 6a3	98	93.32	Azospira oryzae PS	100	93.32
ATTGAACGCTGGCGGCATGCCTTACACATGCAAGTTGAACGGCAGCGCGGGAGCAATCCTGGCGGCGAGTGGCGAACGGGTGAGTAATATATCGGAACGTGCCTTAGAGTGGGGGATAACTAGTCGAAAGACTAGCTAATACCGCATACGACCTACGGGTGAAAGTGGGGGATCGCAAGACCTCATGCTCTTAGAGCGGCCGATATCTGATTAGCTAGTTGGTGGGGTAAAAGCCTACCAAGGCGACGATCAGTAGCTGGTCTGAGAGGACGACCAGCCACACTGGGACTGAGACACGGCCCAGACTCCTACGGGAGGCAGCAGTGGGGAATTTTGGACAATGGGGGCAACCCTGATCCAGCAATGCCGCGTGTGTGAAGAAGGCCTTCGGGTTGTAAA…	1293	0.165113	Bacteria	Proteobacteria	Gammaproteobacteria	Betaproteobacteriales	Burkholderiaceae	Noviherbaspirillum	Noviherbaspirillum autotrophicum strain TSA66	100	98.9	Noviherbaspirillum agri strain K-1-15	100	98.69	Noviherbaspirillum denitrificans strain TSA40	100	97.87	Noviherbaspirillum soli strain SUEMI10	100	97.12	Noviherbaspirillum aurantiacum strain SUEMI08	100	97.05
ATTGAACGCTGGCGGCATGCCTTACACATGCAAGTCGAACGGCAGCACGGGAGCAATCCTGGTGGCGAGTGGCGAACGGGTGAGTAATATATCGGAACGTGCCCAGTCGTGGGGGATAACGTAGCGAAAGCTACGCTAATACCGCATACGATCTATGGATGAAAGCGGGGGATCGCAAGACCTCGCGCGATTGGAGCGGCCGATATCAGATTAGCTAGTTGGTGGGGTAAAGGCCCACCAAGGCGACGATCTGTAGCTGGTCTGAGAGGACGACCAGCCACACTGGAACTGAGACACGGTCCAGACTCCTACGGGAGGCAGCAGTGGGGAATTTTGGACAATGGGCGCAAGCCTGATCCAGCAATGCCGCGTGCAGGACGAAGGCCTTCGGGTTGTAAA…	430	0.05491	Bacteria	Proteobacteria	Gammaproteobacteria	Betaproteobacteriales	Burkholderiaceae	Rhodoferax	Curvibacter delicatus strain NBRC 14919	100	98.56	Curvibacter delicatus strain 146	99	98.49	Rhodoferax saidenbachensis strain ED16	100	97.94	Rhodoferax ferrireducens T118	100	97.74	Curvibacter fontanus strain AQ9	100	97.53
AACGAACGCTGGCGGCAGGCCTAACACATGCAAGTCGAACGCTCGTAGCAATACGGGAGTGGCAGACGGGTGAGGAACACGTGGGAACATACCCTTTGGTTCGGAATAACTCAGGGAAACTTGAGCTAATACCGGATAAGCCCTTACGGGGAAAGATTTATCGCCGAAGGATTGGCCCGCGTCCGATTAGCTAGTTGGTGAGGTAATGGCTCACCAAGGCGACGATCGGTAGCTGGTCTGAGAGGATGATCAGCCACATTGGGACTGAGACACGGCCCAAACTCCTACGGGAGGCAGCAGTGGGGAATATTGGACAATGGGCGCAAGCCTGATCCAGCCATGCCGCGTGAGTGATGACGGCCTTAGGGTTGTAAAGCTCTTTCACCCACGACGATAATG…	316	0.0403524	Bacteria	Proteobacteria	Alphaproteobacteria	Rhizobiales	Beijerinckiaceae	Rhodoblastus	Rhodoblastus sphagnicola strain RS	99	97.94	Rhodoblastus acidophilus strain DSM 137	100	97.59	Beijerinckia derxii subsp. venezuelae strain DSM 2329	100	95.54	Methylocapsa acidiphila strain B2	99	95.51	Beijerinckia indica subsp. lacticogenes strain DSM 1719	100	95.47
ATTGAACGCTGGCGGAATGCTTTACACATGCAAGTCGAACGGCAGCACGGGAGCTTGCTCCTGGTGGCGAGTGGCGAACGGGTGAGTAATGCGTCGGAACGTACCGAGTAATGGGGGATAACGCAGCGAAAGCTGTGCTAATACCGCATACGCCCTGAGGGGGAAAGTGGGGGATCGCAAGACCTCACGTTATTCGAGCGGCCGACGTCTGATTAGCTAGTTGGTGGGGTAATGGCCTACCAAGGCGACGATCAGTAGCGGGTCTGAGAGGATGATCCGCCACACTGGAACTGAGACACGGTCCAGACTCCTACGGGAGGCAGCAGTGGGGAATTTTGGACAATGGGGGCAACCCTGATCCAGCCATTCCGCGTGAGTGAAGAAGGCCTTCGGGTTGTA…	251	0.0320521	Bacteria	Proteobacteria	Gammaproteobacteria	Betaproteobacteriales	Hydrogenophilaceae	Thiobacillus	Thiobacillus thioparus strain THI 111	100	99.66	Thiobacillus thioparus	94	99.64	Thiobacillus thioparus strain Starkey	96	99.57	Thiobacillus denitrificans strain NCIMB 9548	100	98.22	Thiobacillus sajanensis strain 4HG	99	98.14
AATGAACGCTGGCGGCGTGCCTAACACATGCAAGTCGGATGTGCCGCAAGGTGCATGGCAGACGGGTGAGTAACGCGTAGGGAATCTACCTTTTTGTGGGGAATAACGCTCCGAAAGGAGTGGTAATACCGCATGAGACCGTGAGCTGGGATGCTGACGGTGAAACCTGGGGACCGCAAGGCCTGGGGCAAAAAGAGGATCCTGCGTCTGATTAGCTAGTTGGCGGGGTAATGGCCCACCAAGGCGACGATCAGTAGCCGGCCTGAGAGGGTGATCGGCCACACTGGAACTGAGACACGGTCCAGACTCCTACGGGAGGCAGCAGTGGGGAATTTTGCGCAATGGACGAGAGTCTGACGCAGCAACGCCGCGTGGGTGATGAAGGTCTTCGGACTGTAA…	136	0.0173669	Bacteria	Acidobacteria	Holophagae	Holophagales	Holophagaceae	Geothrix	Geothrix fermentans strain H5	99	98.28	Holophaga foetida strain TMBS4	100	95.42	Geobacter uraniireducens Rf4	80	86.21	Cystobacter velatus strain DSM 14718	82	86.05	Cystobacter badius strain DSM 14723	82	86.05
AATGAACGCTGGCGGCGTGCCTAACACATGCAAGTCGGATGTGCCGCAAGGTGCATGGCAGACGGGTGAGTAACGCGTAGGGAATCTACCTTTTTGTGGGGAATAACGCTCCGAAAGGAGTGGTAATACCGCATGAGACCGTCGACTGGGATGTCGGCGGTGAAACCTGGGGACCGCAAGGCCTGGGGCAAAAAGAGGATCCTGCGTCTGATTAGCTAGTTGGCGGGGTAATGGCCCACCAAGGCGACGATCAGTAGCCGGCCTGAGAGGGTGATCGGCCACACTGGAACTGAGACACGGTCCAGACTCCTACGGGAGGCAGCAGTGGGGAATTTTGCGCAATGGACGAGAGTCTGACGCAGCAACGCCGCGTGGGTGATGAAGGTCTTCGGACTGTAA…	117	0.0149406	Bacteria	Acidobacteria	Holophagae	Holophagales	Holophagaceae	Geothrix	Geothrix fermentans strain H5	99	98.28	Holophaga foetida strain TMBS4	100	95.42	Geobacter uraniireducens Rf4	80	86.21	Cystobacter velatus strain DSM 14718	82	86.05	Cystobacter badius strain DSM 14723	82	86.05
AATGAACGCTGGCGGCGTGCCTAACACATGCAAGTCGGATGTGCCGCAAGGTGCATGGCAGACGGGTGAGTAACGCGTAGGGAATCTACCTTTTTGTGGGGAATAACGCTCCGAAAGGAGTGGTAATACCGCATGAGACCGTGGCCTGGGATGGTTACGGTGAAACCTGGGGACCGCAAGGCCTGGGGCAAAAAGAGGATCCTGCGTCTGATTAGCTAGTTGGCGGGGTAATGGCCCACCAAGGCGACGATCAGTAGCCGGCCTGAGAGGGTGATCGGCCACACTGGAACTGAGACACGGTCCAGACTCCTACGGGAGGCAGCAGTGGGGAATTTTGCGCAATGGACGAGAGTCTGACGCAGCAACGCCGCGTGGGTGATGAAGGTCTTCGGACTGTAA…	116	0.0148129	Bacteria	Acidobacteria	Holophagae	Holophagales	Holophagaceae	Geothrix	Geothrix fermentans strain H5	99	98.14	Holophaga foetida strain TMBS4	100	95.35	Geobacter uraniireducens Rf4	80	86.21	Cystobacter velatus strain DSM 14718	82	86.05	Cystobacter badius strain DSM 14723	82	86.05
AATGAACGCTGGCGGCGTGCCTAACACATGCAAGTCGGATGTGCCGCAAGGTGCATGGCAGACGGGTGAGTAACGCGTAGGGAATCTACCTCTTTGTGGGGAATAACGCTCCGAAAGGAGTGGTAATACCGCATGAGACCGAGTGCTGGGATGCATTCGGTGAAACCTGGGGACCGCAAGGCCTGGGGCAAGGAGAGGATCCTGCGTCTGATTAGCTAGTTGGCGGGGTAATGGCCCACCAAGGCGACGATCAGTAGCCGGCCTGAGAGGGTGATCGGCCACACTGGAACTGAGACACGGTCCAGACTCCTACGGGAGGCAGCAGTGGGGAATTTTGCGCAATGGACGAAAGTCTGACGCAGCAACGCCGCGTGGGTGATGAAGGTCTTCGGACTGTAA…	86	0.010982	Bacteria	Acidobacteria	Holophagae	Holophagales	Holophagaceae	Geothrix	Geothrix fermentans strain H5	99	98.28	Holophaga foetida strain TMBS4	100	94.61	Geobacter luticola strain OSK6	82	86.35	Cystobacter velatus strain DSM 14718	82	86.19	Cystobacter badius strain DSM 14723	82	86.19
AACGAACGCTGGCGGCAGGCTTAACACATGCAAGTCGAGCGCCCCGCAAGGGGAGCGGCAGACGGGTGAGTAACGCGTGGGAACCTACCCTTTTCTACGGAATAACGCATGGAAACGTGTGCTAATACCGTATACGCCCTTCGGGGGAAAGATTTATCGGAGAAGGATGGGCCCGCGTTGGATTAGCTAGTTGGTGGGGTAAAGGCCTACCAAGGCGACGATCCATAGCTGGTCTGAGAGGATGATCAGCCACATTGGGACTGAGACACGGCCCAAACTCCTACGGGAGGCAGCAGTGGGGAATATTGGACAATGGGCGCAAGCCTGATCCAGCCATGCCGCGTGAGTGATGAAGGCCCTAGGGTTGTAAAGCTCTTTCACCGGAGAAGATAATGACGG…	70	0.00893883	Bacteria	Proteobacteria	Alphaproteobacteria	Rhizobiales	Rhizobiaceae	Shinella	Gellertiella hungarica strain RAM11	99	98.01	Shinella fusca strain DC-196	100	97.17	Shinella yambaruensis strain NBRC 102122	100	97.02	Shinella yambaruensis strain MS4	100	97.02	Shinella zoogloeoides strain IAM 12669	100	96.95
AACGAACGCTGGCGGCAGGCTTAACACATGCAAGTCGAGCGCCCCGCAAGGGGAGCGGCAGACGGGTGAGTAACGCGTGGGAACCTACCCTTTTCTACGGAATAACGCATGGAAACGTGTGCTAATACCGTATACGCCCTTCGGGGGAAAGATTTATCGGAGAAGGATGGGCCCGCGTTGGATTAGCTAGTTGGTGGGGTAAAGGCCTACCAAGGCGACGATCCATAGCTGGTCTGAGAGGATGATCAGCCACATTGGGACTGAGACACGGCCCAAACTCCTACGGGAGGCAGCAGTGGGGAATATTGGACAATGGGCGCAAGCCTGATCCAGCCATGCCGCGTGAGTGATGAAGGCCCTAGGGTTGTAAAGCTCTTTCACCGGAGAAGATAATGACGG…	64	0.00817265	Bacteria	Proteobacteria	Alphaproteobacteria	Rhizobiales	Rhizobiaceae	Shinella	Gellertiella hungarica strain RAM11	99	98.16	Shinella fusca strain DC-196	100	97.31	Shinella zoogloeoides strain IAM 12669	100	97.09	Shinella zoogloeoides strain ATCC 19623	100	97.09	Mycoplana dimorpha strain NBRC 13291	100	97.09
ATTGAACGCTGGCGGAATGCTTTACACATGCAAGTCGAACGGCAGCACGGGTGCTTGCACCTGGTGGCGAGTGGCGAACGGGTGAGTAATGCATCGGAACGTACCGAGTAATGGGGGATAACGCAGCGAAAGTTGTGCTAATACCGCATACGCCCTGAGGGGGAAAGTGGGGGATCGCAAGACCTCACGTTATTCGAGCGGCCGATGTCTGATTAGCTAGTTGGTGGGGTAAAGGCCTACCAAGGCGACGATCAGTAGCGGGTCTGAGAGGATGATCCGCCACACTGGGACTGAGACACGGCCCAGACTCCTACGGGAGGCAGCAGTGGGGAATTTTGGACAATGGGGGCAACCCTGATCCAGCCATTCCGCGTGAGTGAAGAAGGCCTTCGGGTTGTA…	57	0.00727876	Bacteria	Proteobacteria	Gammaproteobacteria	Betaproteobacteriales	Hydrogenophilaceae	Thiobacillus	Thiobacillus thioparus strain THI 111	100	98.56	Thiobacillus thioparus	94	98.55	Thiobacillus thioparus strain Starkey	96	98.43	Thiobacillus thiophilus strain D24TN	100	97.94	Thiobacillus denitrificans strain NCIMB 9548	100	97.8
ATTGAACGCTGGCGGAATGCTTTACACATGCAAGTCGAACGGCAGCACGGGTGCTTGCACCTGGTGGCGAGTGGCGAACGGGTGAGTAATGCATCGGAACGTACCGAGTAATGGGGGATAACGCAGCGAAAGTTGTGCTAATACCGCATACGCCCTGAGGGGGAAAGTGGGGGATCGCAAGACCTCACGTTATTCGAGCGGCCGATGTCTGATTAGCTAGTTGGTGGGGTAAAGGCCTACCAAGGCGACGATCAGTAGCGGGTCTGAGAGGATGATCCGCCACACTGGGACTGAGACACGGCCCAGACTCCTACGGGAGGCAGCAGTGGGGAATTTTGGACAATGGGGGCAACCCTGATCCAGCCATTCCGCGTGAGTGAAGAAGGCCTTCGGGTTGTA…	54	0.00689567	Bacteria	Proteobacteria	Gammaproteobacteria	Betaproteobacteriales	Hydrogenophilaceae	Thiobacillus	Thiobacillus thioparus	94	98.77	Thiobacillus thioparus strain THI 111	100	98.76	Thiobacillus thioparus strain Starkey	96	98.65	Thiobacillus thiophilus strain D24TN	100	97.87	Thiobacillus sajanensis strain 4HG	99	97.79
ATTGAACGCTGGCGGAATGCTTTACACATGCAAGTCGAGCGGCAGCGCGGGGCAACCTGGCGGCGAGCGGCGAACGGGTGAGTAATGCATCGGAACATGTCCATGTCGTGGGGGATAGCCCGGCGAAAGCCGGATTAATACCGCATAAGCCCGAGAGGGGAAAGCAGGGGACCGCAAGGCCTTGCGCGATTGGGTTGGCCGATGTCCGATTAGCTTGTTGGTGAGGTAAAGGCTTACCAAGGCGATGATCGGTAGCTGGTCTGAGAGGATGATCAGCCACACTGGGACTGAGACACGGCCCAGACTCCTACGGGAGGCAGCAGTGGGGAATTTTGGACAATGGGGGCAACCCTGATCCAGCCATTCCGCGTGAGTGAAGAAGGCCTTCGGGTTGTAAAG…	44	0.00561869	Bacteria	Proteobacteria	Gammaproteobacteria	Betaproteobacteriales	Nitrosomonadaceae	Ellin6067	Methyloversatilis universalis FAM5	94	91.47	Methyloversatilis discipulorum strain FAM1	100	91.36	Methyloversatilis thermotolerans strain 3t	96	91.15	Denitratisoma oestradiolicum strain AcBE2-1	100	91.05	Sulfurisoma sediminicola strain BSN1	100	91
ATTGAACGCTGGCGGAATGCTTTACACATGCAAGTCGAACGGCAGCACGGGTGCTTGCACCTGGTGGCGAGTGGCGAACGGGTGAGTAATGCATCGGAACGTACCGAGTAATGGGGGATAACGCAGCGAAAGTTGTGCTAATACCGCATACGCCCTGAGGGGGAAAGTGGGGGATCGCAAGACCTCACGTTATTCGAGCGGCCGATGTCTGATTAGCTAGTTGGTGGGGTAAAGGCCTACCAAGGCGACGATCAGTAGCGGGTCTGAGAGGATGATCCGCCACACTGGGACTGAGACACGGCCCAGACTCCTACGGGAGGCAGCAGTGGGGAATTTTGGACAATGGGGGCAACCCTGATCCAGCCATTCCGCGTGAGTGAAGAAGGCCTTCGGGTTGTA…	42	0.0053633	Bacteria	Proteobacteria	Gammaproteobacteria	Betaproteobacteriales	Hydrogenophilaceae	Thiobacillus	Thiobacillus thioparus strain THI 111	100	98.49	Thiobacillus thioparus	94	98.48	Thiobacillus thioparus strain Starkey	96	98.36	Thiobacillus thiophilus strain D24TN	100	97.94	Thiobacillus denitrificans strain NCIMB 9548	100	97.67
ATTGAACGCTGGCGGAATGCTTTACACATGCAAGTCGAGCGGCAGCGCGGGGGCAACCCTGGCGGCGAGCGGCGAACGGGTGAGTAATGTATCGGAACGTACCCAGTCGTGGGGGATAACTATCCGAAAGGATAGCTAATACCGCATACGTCCTGAGGGAGAAAGCGGGGGACCGAAAGGCCTCGCGCGATTGGAGCGGCCGATATCGGATTAGCTAGTTGGTGAGGTAAAGGCTCACCAAGGCGACGATCCGTAGCTGGTCTGAGAGGACGACCAGCCACACTGGAACTGAGACACGGTCCAGACTCCTACGGGAGGCAGCAGTGGGGAATTTTGGACAATGGGGGCAACCCTGATCCAGCCATTCCGCGTGAGTGAAGAAGGCCTTCGGGTTGTAAA…	39	0.00498021	Bacteria	Proteobacteria	Gammaproteobacteria	Betaproteobacteriales	Rhodocyclaceae	Sulfuritalea	Sulfuritalea hydrogenivorans sk43H	99	98.55	Sulfurisoma sediminicola strain BSN1	100	96.31	Denitratisoma oestradiolicum strain AcBE2-1	100	95.07	Georgfuchsia toluolica strain G5G6	100	94.96	Rugosibacter aromaticivorans strain Ca6	97	94.83
AGCGAACGCTGGCGGCAGGCTTAACACATGCAAGTCGAGCGGGCGTAGCAATACGTCAGCGGCAGACGGGTGAGTAACGCGTGGGAACATACCTTTTGGTTCGGAACAACACAGGGAAACTTGTGCTAATACCGGATAAGCCCTTACGGGGAAAGATTTATCGCCGAAAGATTGGCCCGCGTCTGATTAGCTAGTTGGTGAGGTAACGGCTCACCAAGGCGACGATCAGTAGCTGGTCTGAGAGGATGATCAGCCACATTGGGACTGAGACACGGCCCAAACTCCTACGGGAGGCAGCAGTGGGGAATATTGGACAATGGGCGAAAGCCTGATCCAGCCATGCCGCGTGAGTGATGAAGGCCCTAGGGTTGTAAAGCTCTTTTGTGCGGGAAGATAATG…	32	0.00408632	Bacteria	Proteobacteria	Alphaproteobacteria	Rhizobiales	Xanthobacteraceae	Bradyrhizobium	Bradyrhizobium erythrophlei strain CCBAU 53325	94	98.88	Bradyrhizobium namibiense strain 5-10	94	98.73	Bradyrhizobium lablabi strain CCBAU 23086	96	98.6	Bradyrhizobium viridifuturi strain SEMIA 690	100	98.58	Bradyrhizobium embrapense strain SEMIA 6208	100	98.58
GATGAACGCTAGCGGGAGGCCTAACACATGCAAGTCGAACGGGATTGGTAGCAATACCATGAGAGTGGCGCACGGGTGAGTAACGCGTATGCAACCTACCTGTAACAGAGGGATAGCCCATAGAAATGTGGATTAATACCTCATAGTCCTGGAGAGTCGCATGGCTTTTCAGGTAAAACTCCGGTGGTTACAGATGGGCATGCGTGACATTAGCTAGTTGGTGAGGTAACGGCTCACCAAGGCAACGATGTCTAGGGGTTCTGAGAGGATGATCCCCCACACTGGTACTGAGACACGGACCAGACTCCTACGGGAGGCAGCAGTGAGGAATATTGGTCAATGGGCGCAAGCCTGAACCAGCCATCCCGCGTGCAGGATGACGGCCCTATGGGTTGTAAA…	28	0.00357553	Bacteria	Bacteroidetes	Bacteroidia	Bacteroidales	Prolixibacteraceae	WCHB1-32	Sunxiuqinia faeciviva strain JAM-BA0302	100	91.62	Mangrovibacterium marinum strain FA423	100	91.02	Sunxiuqinia rutila strain HG677	100	90.99	Sunxiuqinia elliptica strain DQHS4	97	90.4	Prolixibacter denitrificans strain MIC1-1	100	90.4
AACGAACGCTGGCGGCAGGCTTAACACATGCAAGTCGAGCGCCTCGCAAGAGGAGCGGCAGACGGGTGAGTAACGCGTGGGAATCTACCCATCTCTACGGAACAACTCCGGGAAACTGGAGCTAATACCGTATACGTCCTTCGGGAGAAAGATTTATCGGAGATGGATGAGCCCGCGTTGGATTAGCTAGTTGGTGGGGTAATGGCCTACCAAGGCGACGATCCATAGCTGGTCTGAGAGGATGATCAGCCACACTGGGACTGAGACACGGCCCAGACTCCTACGGGAGGCAGCAGTGGGGAATATTGGACAATGGGCGAAAGCCTGATCCAGCCATGCCGCGTGAGTGATGAAGGCCCTAGGGTTGTAAAGCTCTTTCAACGGTGAAGATAATGACGG…	25	0.00319244	Bacteria	Proteobacteria	Alphaproteobacteria	Rhizobiales	Rhizobiaceae	Mesorhizobium	Mesorhizobium qingshengii strain CCBAU 33460	92	100	Mesorhizobium loti strain NBRC 14779	100	99.86	Mesorhizobium loti strain LMG 6125	100	99.86	Mesorhizobium shangrilense strain CCBAU 65327	95	99.78	Mesorhizobium cantuariense strain ICMP 19515	97	99.71
AGCGAACGCTGGCGGCAGGCTTAACACATGCAAGTCGAGCGGGCGTAGCAATACGTCAGCGGCAGACGGGTGAGTAACGCGTGGGAACGTACCTTTTGGTTCGGAACAACACAGGGAAACTTGTGCTAATACCGGATAAGCCCTTACGGGGAAAGATTTATCGCCGAAAGATCGGCCCGCGTCTGATTAGCTAGTTGGTGAGGTAACGGCTCACCAAGGCGACGATCAGTAGCTGGTCTGAGAGGATGATCAGCCACATTGGGACTGAGACACGGCCCAAACTCCTACGGGAGGCAGCAGTGGGGAATATTGGACAATGGGCGCAAGCCTGATCCAGCCATGCCGCGTGAGTGATGAAGGCCCTAGGGTTGTAAAGCTCTTTTGTGCGGGAAGATAATG…	13	0.00166007	Bacteria	Proteobacteria	Alphaproteobacteria	Rhizobiales	Xanthobacteraceae	Afipia	Bradyrhizobium erythrophlei strain CCBAU 53325	94	98.5	Bradyrhizobium namibiense strain 5-10	94	98.35	Bradyrhizobium lablabi strain CCBAU 23086	96	98.23	Bradyrhizobium viridifuturi strain SEMIA 690	100	98.23	Bradyrhizobium embrapense strain SEMIA 6208	100	98.23
GACGAACGCTGGCGGCGTGCTTAACACATGCAAGTCTACGAGAACGAGGTAGCAATATCTTTAGTAAAGTGGCGCACGGGTGCGTAACACGTAAGCAATCTACCTTTGGGTCTGGAATAACTTCGAGAAATCGAGGCTAATACCGGATAATGCAGCGGCACCGCATGGTGATGTTGTTAAAGTTTGAGTAATGCCTATAGATGAGCTTGCGTCTGATTAGCTAGTTGGCAGGGTAAAGGCCTACCAAGGCTACGATCAGTAGCTGGTCTGAGAGGATGATCAGCCACACTGGAACTGAGACACGGTCCAGACTCCTACGGGAGGCAGCAGTGAGGAATATTGGGCAATGCCCGAAAGGGTGACCCAGCAACGCCGCGTGGAGGATGAAGGCCGTAAGGT…	7	0.000893883	Bacteria	Bacteroidetes	Ignavibacteria	Ignavibacteriales	PHOS-HE36	NA	Ignavibacterium album JCM 16511 strain Mat9-16	100	92.89	Ignavibacterium album JCM 16511	100	92.82	Melioribacter roseus P3M-2	100	88.96	Desulfomicrobium hypogeium strain CN-A	80	83.31	Desulfomonile limimaris strain DCB-M	79	83.09
ATTGAACGCTGGCGGCATGCTTTACACATGCAAGTCGAACGGCAGCACGGGGGCAACCCTGGTGGCGAGTGGCGAACGGGTGAGTAATATATCGGAACATATCCGGAAGTGGGGGATAACGTAGCGAAAGTTACGCTAATACCGCATATGCCCTGAGGGGGAAAGGGGGGGATCGCAAGACCTCTCGCTTTCGGAGTGGCCGATATCGGATTAGCTAGTTGGTGAGGTAAAGGCTCACCAAGGCGACGATCCGTAGCTGGTCTGAGAGGACGACCAGCCACACTGGGACTGAGACACGGCCCAGACTCCTACGGGAGGCAGCAGTGGGGAATTTTGGACAATGGGCGCAAGCCTGATCCAGCCATGCCGCGTGAGTGAAGAAGGCCTTCGGGTTGTAAA…	7	0.000893883	Bacteria	Proteobacteria	Gammaproteobacteria	Betaproteobacteriales	Gallionellaceae	NA	Sideroxydans lithotrophicus ES-1	100	95.51	Gallionella capsiferriformans ES-2	100	94.12	Ferriphaselus amnicola strain OYT1	93	93.95	Azospira oryzae strain 6a3	98	93.12	Azospira oryzae PS	100	93.11
AACGAACGCTGGCGGCAGGCCTAACACATGCAAGTCGAACGCCGTAGCAATACGGAGTGGCAGACGGGTGAGTAACACGTGGGAACGTGCCCTTTGGTTCGGAACAACTCCGGGAAACTGGAGTTAATACCGGATAAGCCCTATGGGGGAAAGATTTATCGCCGAAGGATCGGCCCGCGTCTGATTAGCTAGTTGGCGGGGTAATGGCCCACCAAGGCAACGATCAGTAGCTGGTCTGAGAGGATGATCAGCCACATTGGGACTGAGACACGGCCCAAACTCCTACGGGAGGCAGCAGTGGGGAATATTGGACAATGGGCGCAAGCCTGATCCAGCCATGCCGCGTGAGTGATGAAGGCCTTAGGGTTGTAAAGCTCTTTCGCGCGCGACGATAATGAC…	4	0.00051079	Bacteria	Proteobacteria	Alphaproteobacteria	Rhizobiales	Rhizobiales_Incertae_Sedis	Bauldia	Bauldia consociata strain 11	100	94.04	Bauldia litoralis strain 524-16	100	93.83	Methylocystis parvus OBBP	100	92.73	Methylocystis echinoides strain IMET 10491	99	92.51	Methylocella silvestris BL2	100	92.43
ATTGAACGCTGGCGGAATGCTTTACACATGCAAGTCGAACGGCAGCACGGGGGCAACCCTGGTGGCGAGTGGCGAACGGGTGAGTAATACATCGGAACGTGCCCAGTCGTGGGGGATAACTACGCGAAAGCGTAGCTAATACCGCATACGATCTACGGATGAAAGCGGGGGATCGCAAGACCTCGCGCGATTGGAGCGGCCGATGGCAGATTAGGTAGTTGGTGGGGTAAAGGCTCACCAAGCCGTCGATCTGTAGCTGGTCTGAGAGGACGACCAGCCACACTGGGACTGAGACACGGCCCAGACTCCTACGGGAGGCAGCAGTGGGGAATTTTGGACAATGGGCGCAAGCCTGATCCAGCCATTCCGCGTGCAGGATGAAGGCCTTCGGGTTGTAAA…	2	0.000255395	Bacteria	Proteobacteria	Gammaproteobacteria	Betaproteobacteriales	Burkholderiaceae	NA	Ramlibacter ginsenosidimutans strain BXN5-27	100	95.26	Ramlibacter tataouinensis TTB310	100	95.05	Ramlibacter alkalitolerans strain CJ661	98	95.02	Ramlibacter rhizophilus strain THG-YS3.2.7	100	94.91	Ramlibacter monticola strain G-3-2	100	94.64
